# Supplementary material for: From hit to vial: Precision discovery and development of an imidazopyrimidine TLR7/8 agonist adjuvant formulation
Source: PubMed Central journal article supplement — Sci Adv. 2024 Jul 3;10(27):eadg3747. doi: 10.1126/sciadv.adg3747 (PMC11221515; doi:10.1126/sciadv.adg3747), 2024-07-03
Supplement: sciadv.adg3747_sm.pdf [file sciadv.adg3747_sm.pdf]

Supplementary Materials for  
**From hit to vial: Precision discovery and development of an  
imidazopyrimidine TLR7/8 agonist adjuvant formulation**

Dheeraj Soni *et al.*

Corresponding author: Ofer Levy, [ofer.levy@childrens.harvard.edu](mailto:ofer.levy@childrens.harvard.edu);  
David J. Dowling, [david.dowling@childrens.harvard.edu](mailto:david.dowling@childrens.harvard.edu)

*Sci. Adv.* **10**, eadg3747 (2024)  
DOI: 10.1126/sciadv.adg3747

**The PDF file includes:**

Supplementary Text  
Figs. S1 to S10  
Tables S1 to S3  
Legend for data S1

**Other Supplementary Material for this manuscript includes the following:**

Data S1

## Supplementary Materials

### HTS Hit calling method.

All Data was log10-transformed (log10). CrossTalk Corrected luminescence data from columns E, and F was log-transformed (log10) in columns K, and L. Only experimental wells are evaluated, referencing column C with an “if” logic statement. An example of the calculation in column Q, log-transforming data from column E, is shown below:

$$=IF(C2 = "X", LOG10(E2), "")$$

A robust Z score is calculated for each experimental well with adjusted median absolute deviation (MAD) values. First, the plate median and MAD values are generated from the log-transformed data. The absolute deviation for each well value is calculated in columns M and N, an example of which is shown below:

$=IF(C2 = "X", ABS(K2-$I$3), "")$  wherein K2 is a log transformed data point, and I3 is the median value for that plate for that readout.

The MAD is then calculated as the median of each of columns U-X multiplied by 1.4286, an example of which is shown below:

$$=MEDIAN(M2:M385)*1.4286$$

The robust Z score is then calculated as (well\_value – median\_plate) / (MAD\_plate \* 1.4286), an example calculation is shown below:

$=IF($C2="X", ((K2-$I$3)/$I$5), "")$  wherein K2 is a log-transformed well value, I3 is the plate experimental median for that readout, and I5 is the plate experimental MAD for that readout.

Any wells with robust Z score values of 2 or greater in both replicates are considered a hit. This is evaluated in column Q as shown in the example below:

**=IF(AND((O2>I7), (P2>J7), (C2="X")),TRUE,FALSE)** wherein O2 and P2 are robust Z scores for replicates of the luminescence readout, while I7 and J7 represent the luminescence robust Z score threshold (2). "TRUE" will be returned in column Q if the compound meets these hit criteria.

For any well that is determined to be a hit, the Plate:Well compound ID will be displayed in column R as shown in the example below:

**=IF(Q2,CONCATENATE(A2,":",B2),"")** in which Q2 is the TRUE/FALSE value determining the hit status of the compound while A2 is the plate ID and B2 is the well ID.

## Preparation of example S1

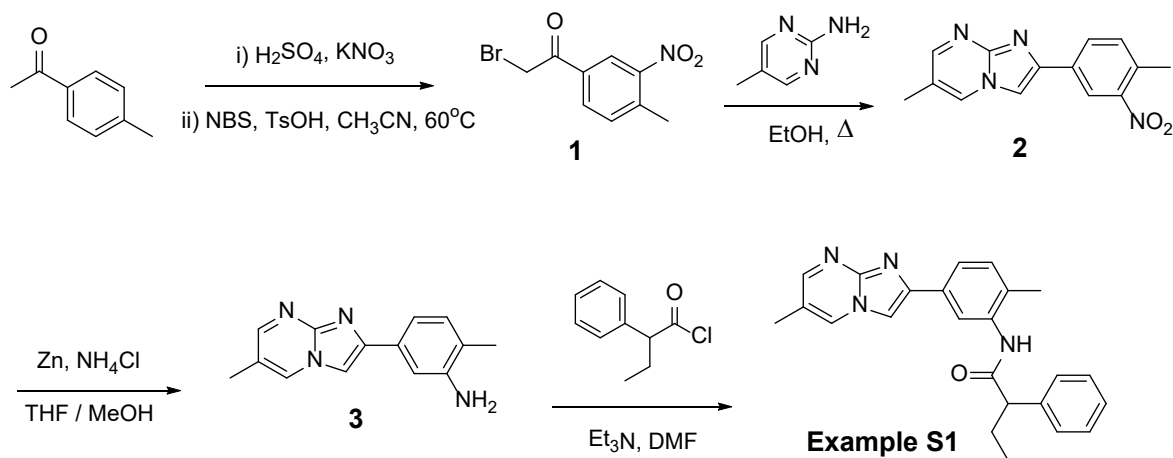

### 2-Bromo-1-(4-methyl-3-nitrophenyl)ethanone (1)

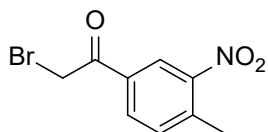

4'-Methylacetophenone (1 g, 7.5 mmol) was dissolved in conc.  $\text{H}_2\text{SO}_4$  (10 mL) and the solution was cooled to 0 °C.  $\text{KNO}_3$  (1 g, 9.9 mmol) was added in portions, and the mixture was stirred at 0 °C for 2 hours, then poured onto crushed ice (100 g), and extracted with EtOAc (2 x 50 mL). The organic phase was washed with brine and concentrated to give 1.3 g of a yellow solid. The nitro intermediate (200 mg, 1.1 mmol) was dissolved in acetonitrile (2 mL). NBS (237 mg, 1.3 mmol) and p-TsOH (200 mg, 1.1) were added. The reaction mixture was heated at 60 °C for 4 hours, then diluted with EtOAc (20 mL) and washed with sat.  $\text{Na}_2\text{S}_2\text{O}_3$  solution and brine. The organic layer was concentrated to give the title compound (260 mg, yield 91%) as a yellow solid.  $^1\text{H}$  NMR (400 MHz,  $\text{CDCl}_3$ ):  $\delta$  8.56 (s, 1H), 8.12 (d, 1H), 7.52 (d, 1H), 4.46 (s, 2H), 2.70 (s, 3H).

### 6-Methyl-2-(4-methyl-3-nitrophenyl)imidazo[1,2-a]pyrimidine (2)

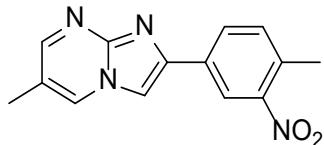

2-Bromo-1-(4-methyl-3-nitrophenyl)ethanone (300 mg, 1.16) and 2-amino-5-methylpyrimidine (200 mg, 1.83 mmol) were dissolved in EtOH (10 mL) and the solution refluxed overnight. The solution was diluted with DCM and washed with NaHCO<sub>3</sub> solution. The organic layer was concentrated and the residue purified by column chromatography to give the title compound (102 mg, yield 30%) as a yellow solid. MS m/z 269.9 [M+H]<sup>+</sup>.

### 2-Methyl-5-(6-methylimidazo[1,2-a]pyrimidin-2-yl)aniline (3)

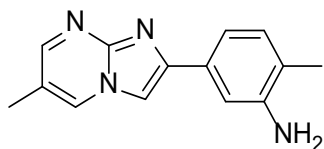

6-Methyl-2-(4-methyl-3-nitrophenyl)imidazo[1,2-a]pyrimidine (600 mg, 2.24 mmol) was dissolved in THF and methanol (3:1, 4 mL). Zinc powder (2.3 g, 35.4 mmol) and NH<sub>4</sub>Cl (2 g, 37.0 mmol) were added to the solution and the mixture was stirred for 1 hour. The solid was filtered, and the filtrate was concentrated, dissolved in EtOAc, and then washed with water. The organic phase was concentrated to give compound the title compound (400 mg, 75% yield) as a yellow solid. MS m/z 238.7 [M+H]<sup>+</sup>.

### 2-Bromo-1-(4-chloro-3-nitrophenyl)ethan-1-one (4)

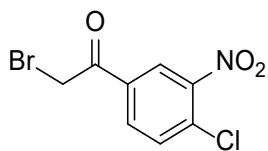

2-Bromo-1-(4-chloro-3-nitrophenyl)ethan-1-one was prepared using a similar procedure to that described for **1**, from 4'-chloroacetophenone. <sup>1</sup>H NMR (400 MHz, DMSO-*d*<sub>6</sub>): δ 8.62 (s, 1H), 8.26 (d, 1H), 8.00 (d, 1H), 5.02 (s, 2H).

**Anilines 5 - 8** were prepared by similar methods to **3**, from the corresponding aminopyrimidine and either **1** or **4**.

| Aniline  | Name                                                                                                                                                     | <sup>1</sup> H NMR (d <sub>6</sub> -DMSO)                                                                               | <i>m/z</i> [M+1] <sup>+</sup> | Starting materials                                                                                    |
|----------|----------------------------------------------------------------------------------------------------------------------------------------------------------|-------------------------------------------------------------------------------------------------------------------------|-------------------------------|-------------------------------------------------------------------------------------------------------|
| <b>5</b> | 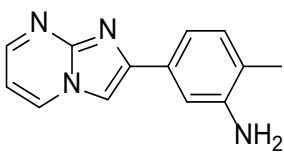<br>5-(Imidazo[1,2-<br>a]pyrimidin-2-yl)-2-<br>methylaniline            | (500MHz) 8.92 (m, 1H), 8.48 (m, 1H), 8.16 (s, 1H), 7.32 (d, 1H), 7.09 (d, 1H), 7.00 (m, 2H), 4.95 (s, 2H), 2.09 (s, 3H) | 224.91                        | <br>and <b>1</b>   |
| <b>6</b> | <br>5-(6-Fluoroimidazo[1,2-<br>a]pyrimidin-2-yl)-2-<br>methylaniline  | (500MHz) 9.18 (m, 1H), 8.65 (d, 1H), 8.18 (s, 1H), 7.31 (d, 1H), 7.09 (m, 1H), 7.00 (d, 1H), 4.95 (s, 2H), 2.09 (s, 3H) | 242.98                        | <br>and <b>1</b> |
| <b>7</b> | <br>5-(6-Methoxyimidazo[1,2-<br>a]pyrimidin-2-yl)-2-<br>methylaniline | (500MHz) 8.66 (d, 1H), 8.36 (d, 1H), 8.05 (s, 1H), 7.27 (d, 1H), 7.05 (m, 1H), 6.98 (d, 1H), 4.92 (s,                   | 254.68                        | <br>and <b>1</b> |

|          |                                                                                                                                               |                                 |       |                                                                                                     |
|----------|-----------------------------------------------------------------------------------------------------------------------------------------------|---------------------------------|-------|-----------------------------------------------------------------------------------------------------|
|          |                                                                                                                                               | 2H), 3.85 (s, 3H), 2.08 (s, 3H) |       |                                                                                                     |
| <b>8</b> | 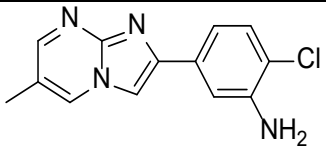<br>2-Chloro-5-(6-methylimidazo[1,2-a]pyrimidin-2-yl)aniline |                                 | 259.1 | <br>and <b>4</b> |

### Example S1. Cpd-02-144-1

#### *N*-(2-Methyl-5-(6-methylimidazo[1,2-a]pyrimidin-2-yl)phenyl)-2-phenylbutanamide

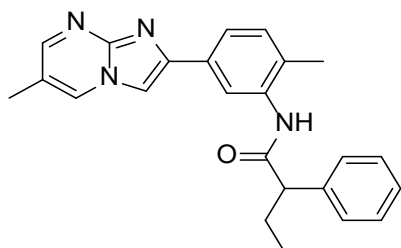

2-Methyl-5-(6-methylimidazo[1,2-a]pyrimidin-2-yl)aniline (75 mg, 0.32 mmol) was dissolved in DMF (5 mL). Triethylamine (0.09 mL, 0.64 mmol) and 2-phenylbutanoyl chloride (150 mg, 0.82 mmol) were added and the mixture was stirred for 1 hour. The reaction mixture was diluted with EtOAc (20 mL) and washed with sat. NaHCO<sub>3</sub> solution (20 mL). The organic phase was concentrated and purified by flash chromatography to give the title compound (26 mg, 21% yield). <sup>1</sup>H NMR (400 MHz, DMSO-*d*<sub>6</sub>): δ 9.59 (s, 1H), 8.72 (s, 1H), 8.41 (d, 1H), 8.23 (s, 1H), 7.90 (s, 1H), 7.68 (d, 1H), 7.44 (m, 2H), 7.37 (m, 2H), 7.27 (m, 2H), 3.69 (m, 1H), 2.30 (s, 3H), 2.11 (s, 3H), 2.10 (m, 1H), 1.74 (m, 1H), 0.94 (t, 3H). MS *m/z* 385.3 [M+H]<sup>+</sup>.

### Example S2. Cpd-02-119

***N*-(5-(6-Fluoroimidazo[1,2-*a*]pyrimidin-2-yl)-2-methylphenyl)-2-phenylbutanamide**

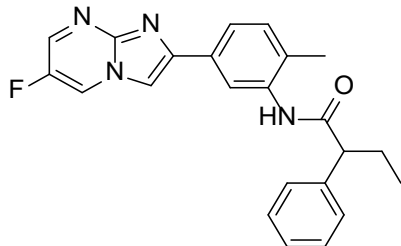

2-Phenylbutanoic acid (16 mg, 0.099 mmol), diisopropylethylamine (29  $\mu$ L, 0.165 mmol) and HATU (38 mg, 0.099 mmol) were dissolved in DMF (6 mL). After 20 minutes, 5-(6-fluoroimidazo[1,2-*a*]pyrimidin-2-yl)-2-methylaniline (20 mg, 0.082 mmol) was added. After stirring for 18 hours, further portions of 2-phenylbutanoic acid (8 mg), diisopropylethylamine (15  $\mu$ L) and HATU (18.5 mg) were added, and the mixture stirred for a further 4 hours. The mixture was diluted with DCM, washed with brine, concentrated and the residue purified by column chromatography on silica gel (0 to 5% MeOH in DCM) to give the title compound (19mg, 56% yield).  $^1\text{H}$  NMR (500 MHz, DMSO-*d*<sub>6</sub>):  $\delta$  9.57 (s, 1H), 9.18 (m, 1H), 8.69 (d, 1H), 8.33 (s, 1H), 7.93 (d, 1H), 7.70 (m, 1H), 7.45 (m, 2H), 7.36 (m, 2H), 7.27 (m, 2H), 3.70 (m, 1H), 2.12 (s, 3H), 2.09 (m, 1H), 1.74 (m, 1H), 0.94 (t, 3H). MS  $m/z$  389.16  $[\text{M}+\text{H}]^+$ .



Supp. Fig. 1

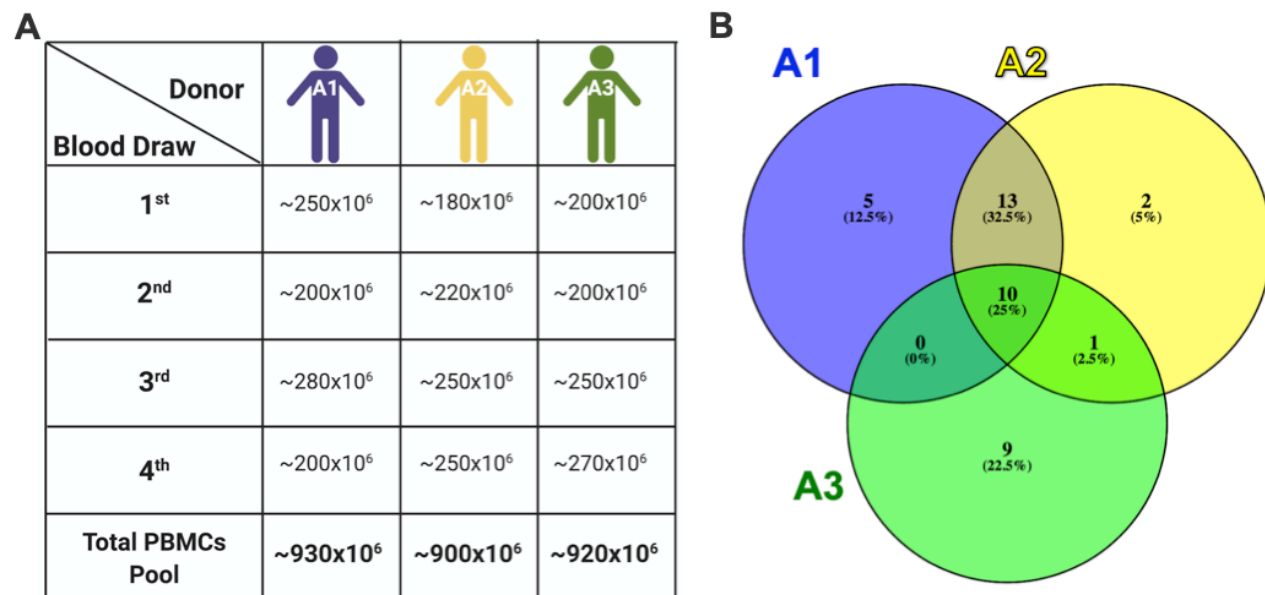

**Fig. S1. Schematic representation of Human PBMCs Bio-bank created for the HTS screen and number of hits.** A) A human bio-bank for PBMCs was created by drawing blood from 3 adult donors over months. A total of ~1 billion PBMCs were cryopreserved along with donor-matched platelet-poor plasma (PPP). B) Using statistical analyses ~250 potential hits were identified, among which ~25 were confirmed hits based on the results of ELISA-based titration assays. The Venn diagram represents number of compounds showing activity in each or multiple donors.

Supp. Fig. 2

**A** *Core replacements*

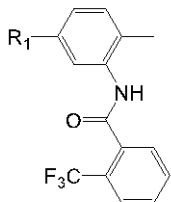

*Example: negative control*

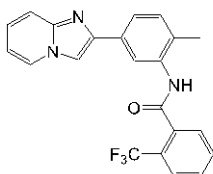

Cpd 2-139-1

| Compound ID | R | TNF Median @ 11 $\mu$ M<br>(PVP-037: 2.40 ng/ml) |
|-------------|---|--------------------------------------------------|
| Cpd 37.37   |   | 3.730                                            |
| Cpd 2-139-1 |   | 0.051                                            |
| Cpd 2-154-2 |   | 0.008                                            |
| Cpd 2-208   |   | 0.049                                            |
| Cpd 2-184-1 |   | 0.008                                            |
| Cpd 3-086-1 |   | 0.040                                            |
| Cpd 2-174-3 |   | 0.060                                            |

**Fig. S2. Bicyclic core replacements for the imidazopyrimidine of Cpd 37.37.** All series resulted in decreased activity, as demonstrated by the amount of TNF produced over 18 hrs in a human PBMCs stimulation assay (N = 5).

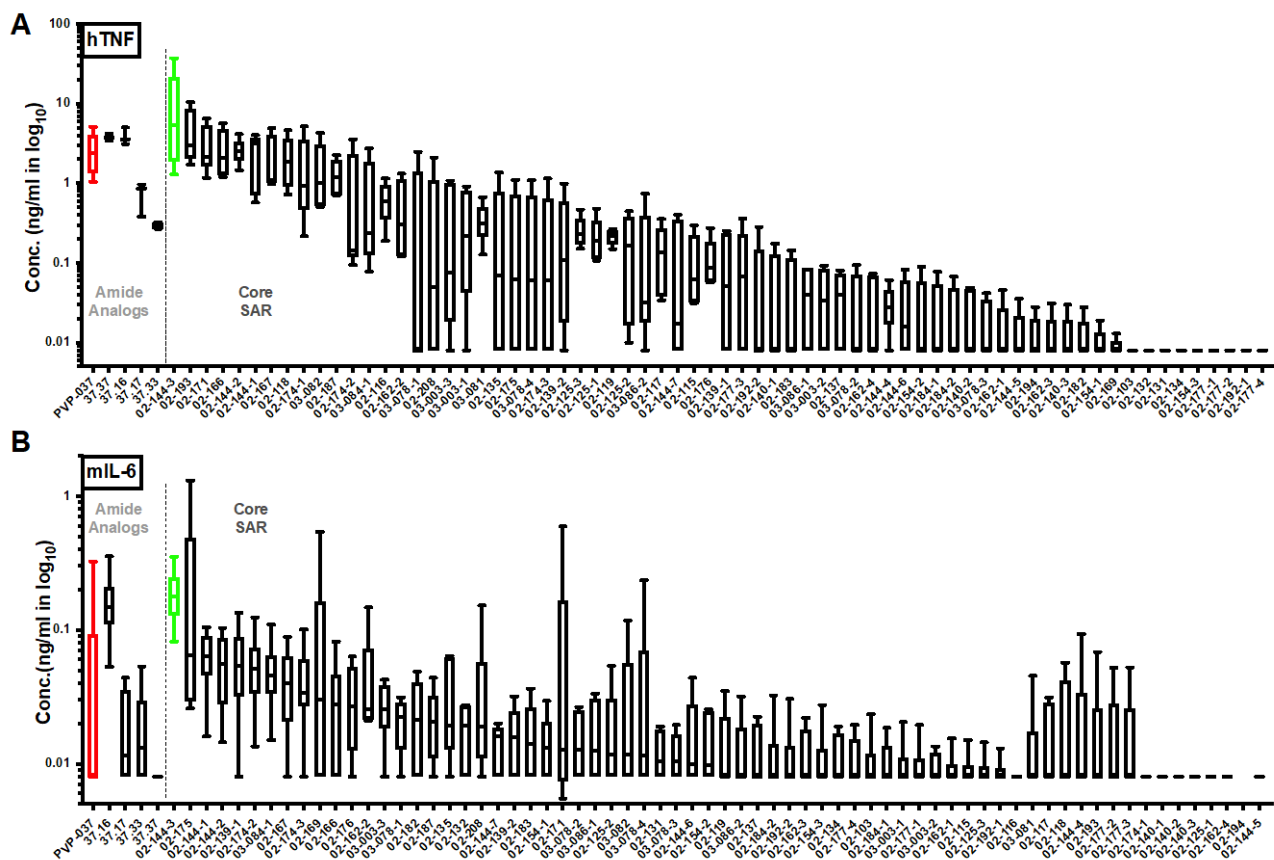

**Fig. S3. PVP-037 analogs show similar rank order potency in human PBMC and murine splenocyte stimulation assays.** Amide analogs of PVP-037 are shown left of dotted line in A and B. 37.37 was identified to possess enhanced activity (in human PBMCs), and further SAR was developed around core substituents and core replacements (right of dotted line in A and B). A) The graph depicts amount of TNF produced by representative analogs over 18 hrs in a human PBMCs stimulation assay. B) The graph depicts IL-6 production by analogs over 18 hrs in a murine splenocyte stimulation assay. Results are presented as box and whisker plots (N = 3 - 5). Cpd 2-144-3 referred to as PVP-037.1 was identified as the most potent molecule with an increased activity profile towards human and mouse leukocytes. Data and compound structures are included in Table S3.

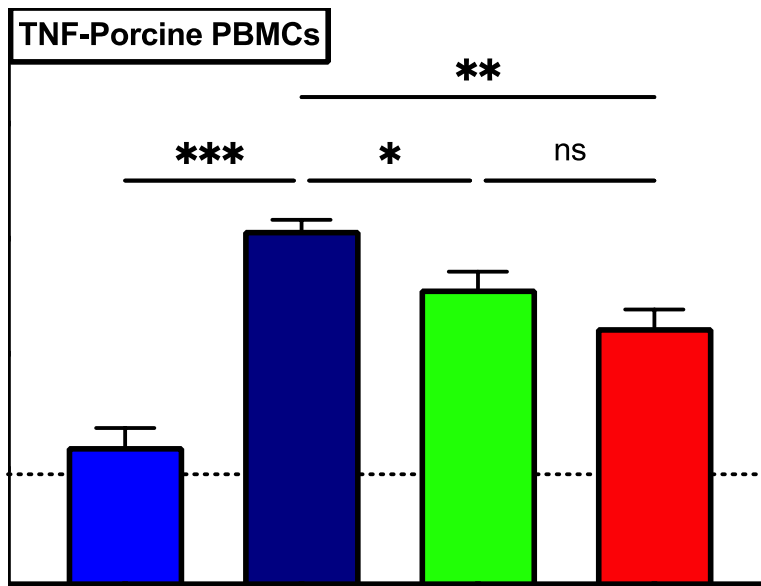

**Fig. S4. Chemically optimized IMPs demonstrate enhanced activation of primary porcine PBMC *in vitro*.** PBMCs were isolated from adult pigs and cryo-preserved prior to *in vitro* culture for 24 hrs with buffer control (DMSO), PamCSK<sub>4</sub> (100 µg/ml), LPS (100 ng/ml), R848 (10 µM), or analogs PVP-037 IMP family. Supernatants were collected for TNF ELISA (N = 5). Results represent mean ± SEM. For comparison at individual concentrations, repeated measures one-way ANOVA, \*P < 0.05, \*\*P < 0.01, \*\*\*P < 0.001. ns, not significant.

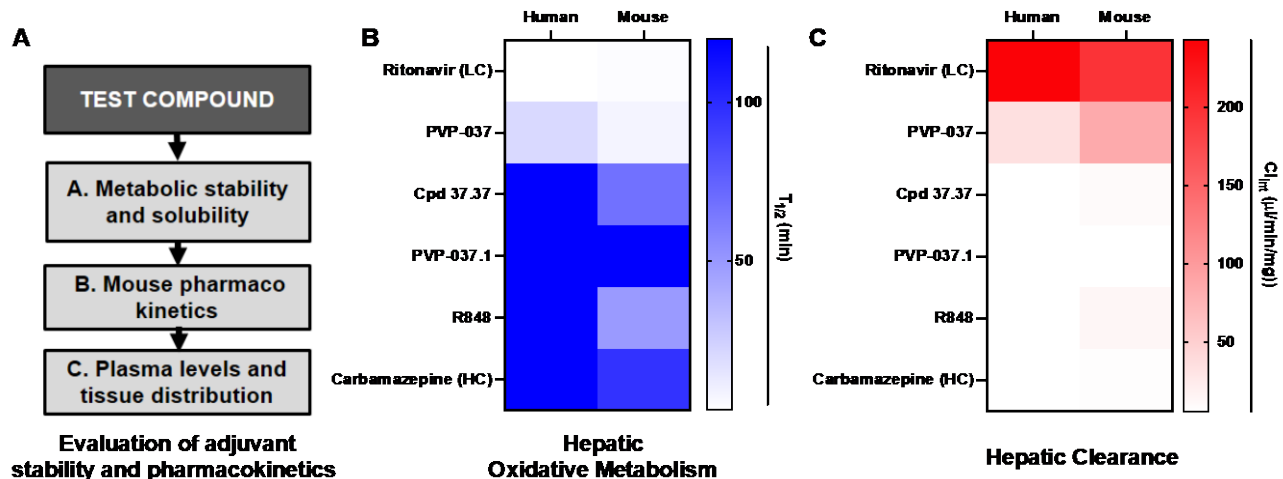

**Fig. S5. PVP-037 based SAR improved molecular metabolic stability and pharmacokinetic profile.** A) Steps for evaluation of adjuvant and pharmacokinetics to guide screening of adjuvant candidate with optimal PK/ADME profile. The ideal compound demonstrates enhanced resistance to oxidative hepatic metabolism as well as clearance rate to prevent systemic exposure B) Heat-map representative of half-life in human and mouse liver microsomal incubation. PVP-037.1 showed enhanced profile compared to PVP-037, demonstrating resistance to hepatic oxidative metabolism. C) Heat-map representative of clearance rate human and mouse liver microsomal incubation. PVP-037.1 demonstrated an enhanced clearance rate both in human and mouse microsomes, suggesting lower potential for systemic accumulation compared to PVP-037.

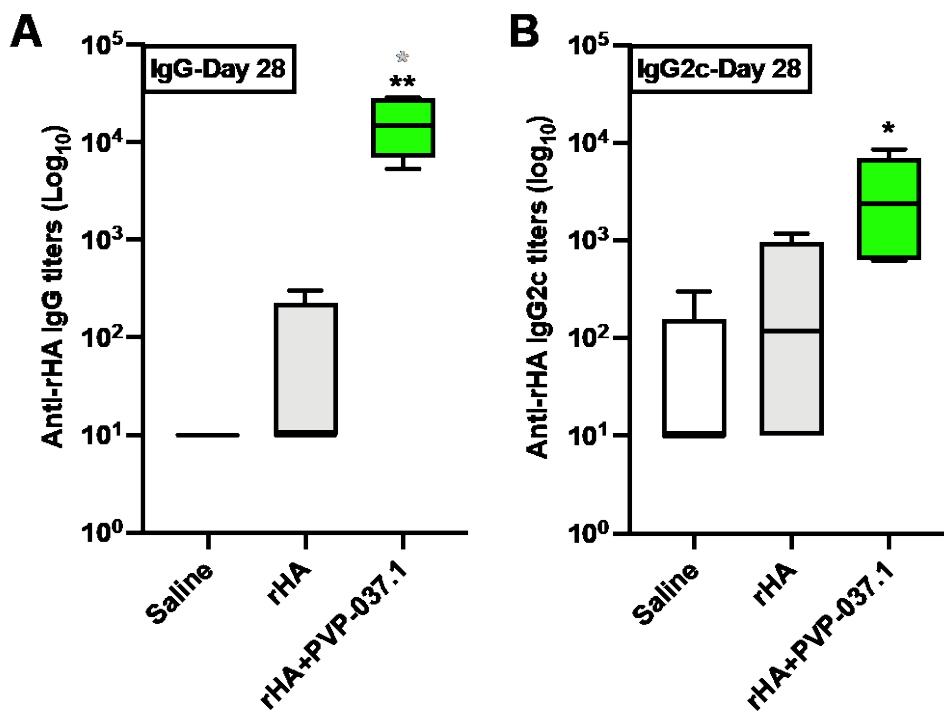

**Fig. S6. PVP-037.1 demonstrated robust adjuvanticity upon subcutaneous immunization.** 6-8 week old C57BL/6 adult mice were vaccinated subcutaneously (Day 0) with saline, rHA alone (1  $\mu$ g antigen from Flublok 2017/18), rHA admixed with the PVP-037.1 (100 nmol). Ab titers for rHA-specific total IgG and subtypes were measured by ELISA 28 days post-immunization (N = 5 - 10). Results represent median  $\pm$  SEM. For comparison at individual concentrations, repeated measures one-way ANOVA, \*P < 0.05, \*\*P < 0.01.

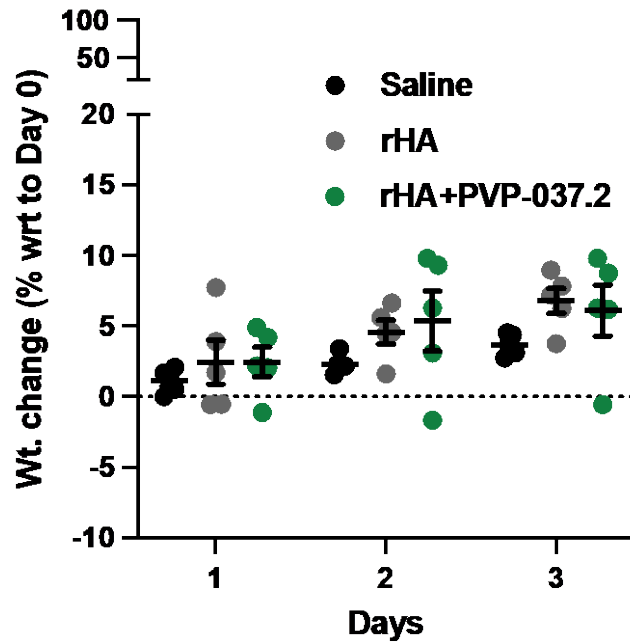

**Fig. S7. Mice vaccinated with PVP-037.2 maintain normal weight gain.** Young C57BL/6 adult mice (6-8 weeks old) were vaccinated IM (Day 0) with saline, rHA alone (1  $\mu$ g antigen from Flublok 2017/18), rHA admixed with the PVP-037.2 (100 nmol). Body weight was measured 3 days post vaccination and presented as percent weight change as compared to day 0 (N = 5). Results represent mean  $\pm$  SEM. No significant differences were observed between treatment groups.

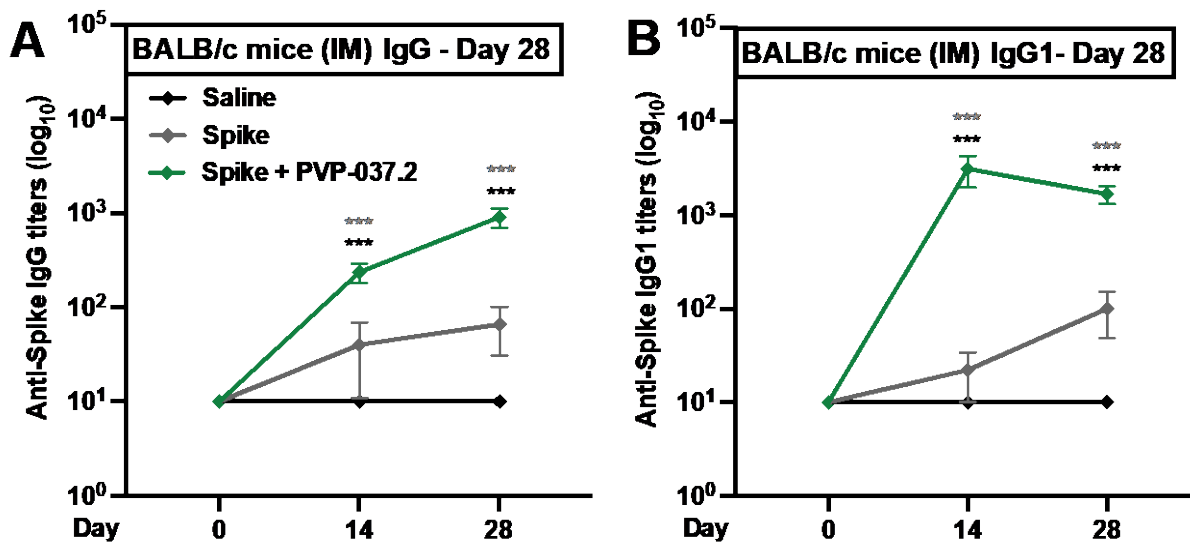

**Fig. S8. PVP-037.2 demonstrates robust adjuvanticity across mouse strains.** 6-8 weeks old BALB/c adult mice were vaccinated IM (Day 0) with saline, Spike alone (1  $\mu$ g antigen from wild type SARS-CoV-2), Spike admixed with the PVP-037.2 (100 nmol). Ab titers for Spike-specific IgG (A) and IgG1 (B) were measured by ELISA on Days 0-, 14- and 28-days post-immunization (N = 10). Results represent mean  $\pm$  SEM. For comparison at individual days, repeated measures two-way ANOVA, \* $p < 0.05$ , \*\* $p < 0.01$ , \*\*\* $p < 0.001$ .



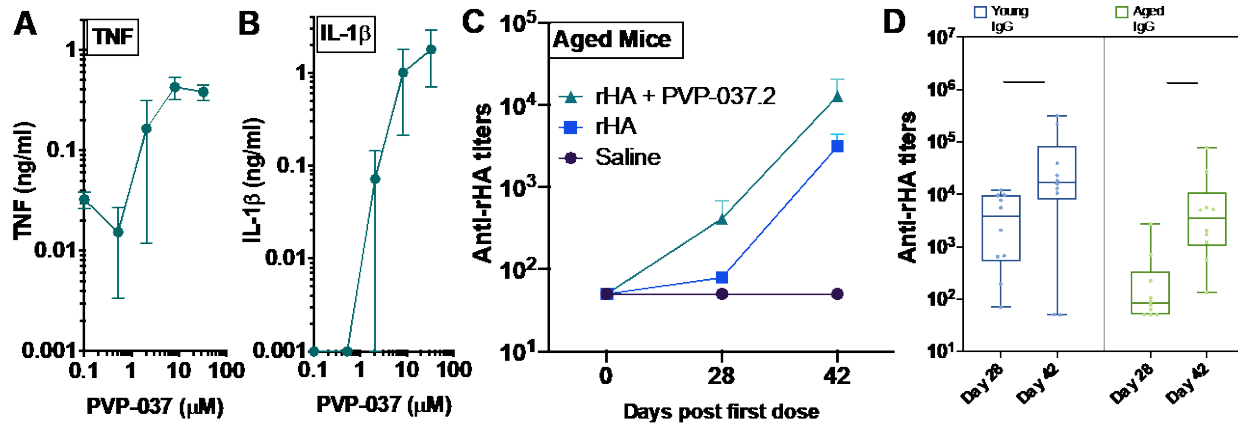

**Fig. S9. PVP-037.2 demonstrates robust adjuvanticity in elder human PBMCs *in vitro* and aged mice *in vivo*.** PVP-037 is active in elder human PBMCs *in vitro*, as indicated by titratable TNF (A) and IL-1β (B) responses measured by ELISA after 24hrs stimulation. Results represent mean ± SEM (N = 5). (C & D) 6-8 weeks and 56 weeks old BALB/c adult mice were vaccinated IM (Day 0) with saline, rHA alone (1 μg antigen from Flublok 2019/20) or rHA admixed with the PVP-037.2 (100 nmol). Ab titers for rHA-specific total IgG were measured by ELISA on Days 0-, 28- and 42-days post-immunization (N = 10 mice per group). Anti-rHA total IgG titers are shown as mean ± SEM (C) and median with IQR (D). Repeated measures one-way ANOVA was applied for intra-group comparison for post-first versus post-second dose (i.e., day 42 versus 28, \*p < 0.05, \*\*\*p < 0.001).

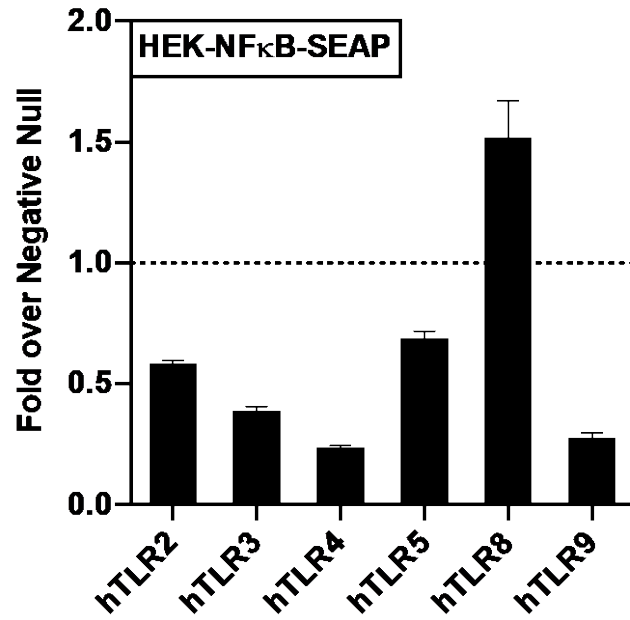

**Fig. S10. PVP-037.2 demonstrated TLR8-dependent activity *in vitro*.** HEK-293 cells transfected with human TLRs and an NF- $\kappa$ B-driven reporter SEAP gene were stimulated for 18–24 h with PVP.037.2 at 33  $\mu$ M. Bar graphs represents the mean of triplicate culture wells, and is representative of two separate experiments. Both were transfected and non-transfected parental Null cell for TLR2, -3, -4, -5, or -9 HEK293 were stimulated with PVP.037.2, and graphed as fold- change of the TLR competent cell response over the negative Null cell.

**Table S1.**

| <b>Library</b> | <b>Plate</b> | <b>Library</b> | <b>Plate</b> | <b>Library</b> | <b>Plate</b> | <b>Library</b> | <b>Plate</b> |
|----------------|--------------|----------------|--------------|----------------|--------------|----------------|--------------|
| ChemDiv1       | 587          | ChemBridge3    | 1592         | ChemDiv6       | 1846         | ChemDiv7       | 3467         |
| ChemDiv1       | 588          | ChemBridge3    | 1593         | ChemDiv6       | 1847         | ChemDiv7       | 3468         |
| ChemDiv1       | 589          | ChemBridge3    | 1594         | ChemDiv6       | 1848         | ChemDiv7       | 3469         |
| ChemDiv1       | 590          | ChemBridge3    | 1595         | ChemDiv6       | 1849         | ChemDiv7       | 3470         |
| ChemDiv1       | 591          | ChemBridge3    | 1596         | ChemDiv6       | 1850         | ChemDiv7       | 3471         |
| ChemDiv1       | 592          | ChemBridge3    | 1597         | ChemDiv6       | 1851         | ChemDiv7       | 3472         |
| ChemDiv1       | 593          | ChemBridge3    | 1598         | ChemDiv6       | 1852         | ChemDiv7       | 3473         |
| ChemDiv1       | 594          | ChemBridge3    | 1599         | ChemDiv6       | 1853         | ChemDiv7       | 3474         |
| ChemDiv1       | 595          | ChemBridge3    | 1600         | ChemDiv6       | 1854         | ChemDiv7       | 3475         |
| ChemDiv1       | 596          | ChemBridge3    | 1601         | ChemDiv6       | 1855         | ChemDiv7       | 3476         |
| ChemDiv1       | 597          | ChemBridge3    | 1602         | ChemDiv6       | 1856         | ChemDiv7       | 3477         |
| ChemDiv1       | 598          | ChemBridge3    | 1603         | ChemDiv6       | 1857         | ChemDiv7       | 3478         |
| ChemDiv1       | 599          | ChemBridge3    | 1604         | ChemDiv6       | 1858         | ChemDiv7       | 3479         |
| ChemDiv1       | 600          | ChemBridge3    | 1605         | ChemDiv6       | 1859         | ChemDiv7       | 3480         |
| ChemDiv1       | 601          | ChemBridge3    | 1606         | ChemDiv6       | 1860         | ChemDiv7       | 3481         |
| ChemDiv1       | 602          | ChemDiv4       | 1607         | ChemDiv6       | 1861         | ChemDiv7       | 3482         |
| ChemDiv1       | 603          | ChemDiv4       | 1608         | ChemDiv6       | 1862         | ChemDiv7       | 3483         |
| ChemDiv1       | 604          | ChemDiv4       | 1609         | ChemDiv6       | 1863         | ChemDiv7       | 3484         |
| ChemDiv1       | 605          | ChemDiv4       | 1610         | ChemDiv6       | 1864         | ChemDiv7       | 3485         |
| ChemDiv1       | 606          | ChemDiv4       | 1611         | ChemDiv6       | 1865         | ChemDiv7       | 3486         |
| ChemDiv1       | 607          | ChemDiv4       | 1612         | ChemDiv6       | 1866         | ChemDiv7       | 3487         |
| ChemDiv1       | 608          | ChemDiv4       | 1613         | ChemDiv6       | 1867         | ChemDiv7       | 3488         |
| ChemDiv1       | 609          | ChemDiv4       | 1614         | ChemDiv6       | 1868         | ChemDiv7       | 3489         |
| ChemDiv1       | 610          | ChemDiv4       | 1619         | ChemDiv6       | 1869         | ChemDiv7       | 3490         |
| ChemDiv1       | 611          | ChemDiv4       | 1620         | ChemDiv6       | 1870         | ChemDiv7       | 3491         |
| ChemDiv1       | 612          | ChemDiv4       | 1621         | ChemDiv6       | 1871         | ChemDiv7       | 3492         |
| ChemDiv1       | 613          | ChemDiv4       | 1622         | ChemDiv6       | 1872         | ChemDiv7       | 3493         |
| ChemDiv1       | 614          | ChemDiv4       | 1623         | ChemDiv6       | 1873         | ChemDiv7       | 3494         |
| ChemDiv1       | 615          | ChemDiv4       | 1624         | ChemDiv6       | 1874         | ChemDiv7       | 3495         |
| ChemDiv1       | 616          | ChemDiv4       | 1625         | ChemDiv6       | 1875         | ChemDiv7       | 3496         |
| ChemDiv1       | 617          | ChemDiv4       | 1626         | ChemDiv6       | 1876         | ChemDiv7       | 3497         |
| ChemDiv1       | 618          | ChemDiv4       | 1627         | ChemDiv6       | 1877         | ChemDiv7       | 3498         |
| ChemDiv1       | 619          | ChemDiv4       | 1628         | ChemDiv6       | 1878         | ChemDiv7       | 3499         |
| ChemDiv1       | 620          | ChemDiv4       | 1629         | ChemDiv6       | 1879         | ChemDiv7       | 3500         |
| ChemDiv1       | 621          | ChemDiv4       | 1630         | ChemDiv6       | 1880         | ChemDiv7       | 3501         |
| ChemDiv1       | 622          | ChemDiv4       | 1631         | ChemDiv6       | 1881         | ChemDiv7       | 3502         |
| ChemDiv1       | 623          | ChemDiv4       | 1632         | ChemDiv6       | 1882         | ChemDiv7       | 3503         |

|          |     |          |      |          |      |          |      |
|----------|-----|----------|------|----------|------|----------|------|
| ChemDiv1 | 624 | ChemDiv4 | 1633 | ChemDiv6 | 1883 | ChemDiv7 | 3504 |
| ChemDiv1 | 625 | ChemDiv4 | 1634 | ChemDiv6 | 1884 | ChemDiv7 | 3505 |
| ChemDiv1 | 626 | ChemDiv4 | 1635 | ChemDiv6 | 1885 | ChemDiv7 | 3506 |
| ChemDiv1 | 627 | ChemDiv4 | 1636 | ChemDiv6 | 1886 | ChemDiv7 | 3507 |
| ChemDiv1 | 628 | ChemDiv4 | 1637 | ChemDiv6 | 1887 | ChemDiv7 | 3508 |
| ChemDiv1 | 629 | ChemDiv4 | 1638 | ChemDiv6 | 1888 | ChemDiv7 | 3509 |
| ChemDiv1 | 630 | ChemDiv4 | 1639 | ChemDiv6 | 1889 | ChemDiv7 | 3510 |
| ChemDiv1 | 631 | ChemDiv4 | 1640 | ChemDiv6 | 1890 | ChemDiv7 | 3511 |
| ChemDiv1 | 632 | ChemDiv4 | 1641 | ChemDiv6 | 1891 | ChemDiv7 | 3512 |
| ChemDiv1 | 633 | ChemDiv4 | 1642 | ChemDiv6 | 1892 | ChemDiv7 | 3513 |
| ChemDiv1 | 634 | ChemDiv4 | 1643 | ChemDiv6 | 1893 | ChemDiv7 | 3514 |
| ChemDiv1 | 635 | ChemDiv4 | 1644 | ChemDiv6 | 1894 | ChemDiv7 | 3515 |
| ChemDiv1 | 636 | ChemDiv4 | 1645 | ChemDiv6 | 1895 | ChemDiv7 | 3516 |
| ChemDiv1 | 637 | ChemDiv4 | 1646 | ChemDiv6 | 1896 | ChemDiv7 | 3517 |
| ChemDiv1 | 638 | ChemDiv4 | 1647 | ChemDiv6 | 1897 | ChemDiv7 | 3518 |
| ChemDiv1 | 639 | ChemDiv4 | 1648 | ChemDiv6 | 1898 | ChemDiv7 | 3519 |
| ChemDiv1 | 640 | Asinex1  | 1671 | ChemDiv6 | 1899 | ChemDiv7 | 3520 |
| ChemDiv1 | 641 | Asinex1  | 1672 | ChemDiv6 | 1900 | ChemDiv7 | 3521 |
| ChemDiv1 | 642 | Asinex1  | 1673 | ChemDiv6 | 1901 | ChemDiv7 | 3522 |
| ChemDiv1 | 643 | Asinex1  | 1674 | ChemDiv6 | 1902 | ChemDiv7 | 3523 |
| ChemDiv1 | 644 | Asinex1  | 1675 | ChemDiv6 | 1903 | ChemDiv7 | 3524 |
| ChemDiv1 | 645 | Asinex1  | 1676 | ChemDiv6 | 1904 | ChemDiv7 | 3525 |
| ChemDiv1 | 646 | Asinex1  | 1677 | ChemDiv6 | 1905 | ChemDiv7 | 3526 |
| ChemDiv1 | 647 | Asinex1  | 1678 | ChemDiv6 | 1906 | ChemDiv7 | 3527 |
| ChemDiv1 | 648 | Asinex1  | 1679 | ChemDiv6 | 1907 | ChemDiv7 | 3528 |
| ChemDiv1 | 649 | Asinex1  | 1680 | ChemDiv6 | 1908 | ChemDiv7 | 3529 |
| ChemDiv1 | 650 | Asinex1  | 1681 | ChemDiv6 | 1909 | ChemDiv7 | 3530 |
| ChemDiv1 | 651 | Asinex1  | 1682 | ChemDiv6 | 1910 | ChemDiv7 | 3531 |
| ChemDiv1 | 652 | Asinex1  | 1683 | ChemDiv6 | 1911 | ChemDiv7 | 3532 |
| ChemDiv1 | 653 | Asinex1  | 1684 | ChemDiv6 | 1912 | ChemDiv7 | 3533 |
| ChemDiv1 | 654 | Asinex1  | 1685 | ChemDiv6 | 1913 | ChemDiv7 | 3534 |
| ChemDiv1 | 655 | Asinex1  | 1686 | ChemDiv6 | 1914 | ChemDiv7 | 3535 |
| ChemDiv1 | 656 | Asinex1  | 1687 | ChemDiv6 | 1915 | ChemDiv7 | 3536 |
| ChemDiv1 | 657 | Asinex1  | 1688 | ChemDiv6 | 1916 | ChemDiv7 | 3537 |
| ChemDiv1 | 658 | Asinex1  | 1689 | ChemDiv6 | 1917 | ChemDiv7 | 3538 |
| ChemDiv1 | 659 | Asinex1  | 1690 | ChemDiv6 | 1918 | ChemDiv7 | 3539 |
| ChemDiv1 | 660 | Asinex1  | 1691 | ChemDiv6 | 1919 | ChemDiv7 | 3540 |
| ChemDiv1 | 661 | Asinex1  | 1692 | Gray1    | 2043 | ChemDiv7 | 3541 |
| ChemDiv1 | 662 | Asinex1  | 1693 | Biomol4  | 2089 | ChemDiv7 | 3542 |
| ChemDiv1 | 663 | Asinex1  | 1694 | Biomol4  | 2090 | ChemDiv7 | 3543 |

|          |      |          |      |                  |      |                  |      |
|----------|------|----------|------|------------------|------|------------------|------|
| ChemDiv1 | 664  | Asinex1  | 1695 | Microsource1     | 2091 | ChemDiv7         | 3544 |
| ChemDiv1 | 665  | Asinex1  | 1696 | Microsource1     | 2092 | ChemDiv7         | 3545 |
| ChemDiv1 | 666  | Asinex1  | 1697 | Microsource1     | 2093 | ChemDiv7         | 3546 |
| ChemDiv1 | 667  | Asinex1  | 1698 | Microsource1     | 2094 | ChemDiv7         | 3547 |
| ChemDiv1 | 668  | Asinex1  | 1699 | Prestwick2       | 2095 | ChemDiv7         | 3548 |
| ChemDiv3 | 1473 | Asinex1  | 1700 | Prestwick2       | 2096 | ChemDiv7         | 3549 |
| ChemDiv3 | 1474 | Asinex1  | 1701 | Prestwick2       | 2097 | ChemDiv7         | 3550 |
| ChemDiv3 | 1475 | Asinex1  | 1702 | Prestwick2       | 2098 | ChemDiv7         | 3551 |
| ChemDiv3 | 1476 | Asinex1  | 1703 | EMD1             | 3229 | ChemDiv7         | 3552 |
| ChemDiv3 | 1477 | Asinex1  | 1704 | LOPAC1           | 3260 | ChemDiv7         | 3553 |
| ChemDiv3 | 1478 | Asinex1  | 1705 | LOPAC1           | 3261 | ChemDiv7         | 3554 |
| ChemDiv3 | 1479 | Asinex1  | 1706 | LOPAC1           | 3262 | ChemDiv7         | 3555 |
| ChemDiv3 | 1480 | Enamine2 | 1716 | LOPAC1           | 3263 | ChemDiv7         | 3556 |
| ChemDiv3 | 1481 | Enamine2 | 1717 | MSDiscovery1     | 3264 | ChemDiv7         | 3557 |
| ChemDiv3 | 1482 | Enamine2 | 1718 | LINCS1           | 3265 | ChemDiv7         | 3558 |
| ChemDiv3 | 1483 | Enamine2 | 1719 | LINCS2           | 3295 | ChemDiv7         | 3559 |
| ChemDiv3 | 1484 | ChemDiv6 | 1795 | NCC2-2012        | 3392 | ChemDiv7         | 3560 |
| ChemDiv3 | 1485 | ChemDiv6 | 1796 | BiomolICCBL-2012 | 3402 | ChemDiv7         | 3561 |
| ChemDiv3 | 1486 | ChemDiv6 | 1797 | BiomolICCBL-2012 | 3403 | ChemDiv7         | 3562 |
| ChemDiv3 | 1487 | ChemDiv6 | 1798 | CB GPCR          | 3407 | ChemDiv7         | 3563 |
| ChemDiv3 | 1488 | ChemDiv6 | 1799 | CB IONCore       | 3408 | ChemDiv7         | 3564 |
| ChemDiv3 | 1489 | ChemDiv6 | 1800 | CB NHRBCore      | 3409 | ChemDiv7         | 3565 |
| ChemDiv3 | 1490 | ChemDiv6 | 1801 | CB KINACore      | 3410 | ChemDiv7         | 3566 |
| ChemDiv3 | 1491 | ChemDiv6 | 1802 | Tocris2          | 3411 | ChemDiv7         | 3567 |
| ChemDiv3 | 1492 | ChemDiv6 | 1803 | Tocris2          | 3412 | CMLD-BU-July2013 | 3568 |
| ChemDiv3 | 1493 | ChemDiv6 | 1804 | Tocris2          | 3413 | CMLD-BU-July2013 | 3569 |
| ChemDiv3 | 1494 | ChemDiv6 | 1805 | Tocris2          | 3414 | CMLD-BU-July2013 | 3570 |
| ChemDiv3 | 1495 | ChemDiv6 | 1806 | LINCS3           | 3426 | CMLD-BU-July2013 | 3571 |
| ChemDiv3 | 1496 | ChemDiv6 | 1807 | ChemDiv7         | 3428 | CMLD-BU-July2013 | 3572 |
| ChemDiv3 | 1497 | ChemDiv6 | 1808 | ChemDiv7         | 3429 | CMLD-BU-July2013 | 3573 |
| ChemDiv3 | 1498 | ChemDiv6 | 1809 | ChemDiv7         | 3430 | CMLD-BU-July2013 | 3574 |

|             |      |          |      |          |      |                      |      |
|-------------|------|----------|------|----------|------|----------------------|------|
| ChemDiv3    | 1499 | ChemDiv6 | 1810 | ChemDiv7 | 3431 | CMLD-BU-<br>July2013 | 3575 |
| ChemDiv3    | 1500 | ChemDiv6 | 1811 | ChemDiv7 | 3432 | HME1                 | 3576 |
| ChemDiv3    | 1501 | ChemDiv6 | 1812 | ChemDiv7 | 3433 | NCC1-2013            | 3577 |
| ChemDiv3    | 1502 | ChemDiv6 | 1813 | ChemDiv7 | 3434 | NCC1-2013            | 3578 |
| ChemDiv3    | 1503 | ChemDiv6 | 1814 | ChemDiv7 | 3435 | NCC2-2013            | 3579 |
| ChemDiv3    | 1504 | ChemDiv6 | 1815 | ChemDiv7 | 3436 | SYNthesis2           | 3580 |
| ChemDiv3    | 1505 | ChemDiv6 | 1816 | ChemDiv7 | 3437 | eMolecules<br>2014   | 3604 |
| ChemDiv3    | 1506 | ChemDiv6 | 1817 | ChemDiv7 | 3438 | Cayman<br>Biolipid 1 | 3648 |
| ChemDiv3    | 1507 | ChemDiv6 | 1818 | ChemDiv7 | 3439 | Cayman<br>Biolipid 1 | 3649 |
| ChemDiv3    | 1508 | ChemDiv6 | 1819 | ChemDiv7 | 3440 | Cayman<br>Biolipid 1 | 3650 |
| ChemDiv3    | 1509 | ChemDiv6 | 1820 | ChemDiv7 | 3441 | Selleck-10mM         | 3651 |
| ChemDiv3    | 1510 | ChemDiv6 | 1821 | ChemDiv7 | 3442 | Selleck-10mM         | 3652 |
| ChemDiv3    | 1511 | ChemDiv6 | 1822 | ChemDiv7 | 3443 | Selleck-10mM         | 3653 |
| ChemDiv3    | 1512 | ChemDiv6 | 1823 | ChemDiv7 | 3444 | Selleck-10mM         | 3654 |
| ChemDiv3    | 1513 | ChemDiv6 | 1824 | ChemDiv7 | 3445 | Selleck-10mM         | 3655 |
| ChemDiv3    | 1514 | ChemDiv6 | 1825 | ChemDiv7 | 3446 | Selleck-10mM         | 3656 |
| ChemDiv3    | 1515 | ChemDiv6 | 1826 | ChemDiv7 | 3447 | Selleck-10mM         | 3657 |
| ChemDiv3    | 1516 | ChemDiv6 | 1827 | ChemDiv7 | 3448 | Selleck-<br>3.33mM   | 3658 |
| ChemDiv3    | 1517 | ChemDiv6 | 1828 | ChemDiv7 | 3449 | Selleck-<br>3.33mM   | 3659 |
| ChemDiv3    | 1518 | ChemDiv6 | 1829 | ChemDiv7 | 3450 | Selleck-<br>3.33mM   | 3660 |
| ChemDiv3    | 1519 | ChemDiv6 | 1830 | ChemDiv7 | 3451 | Selleck-<br>3.33mM   | 3661 |
| ChemBridge3 | 1577 | ChemDiv6 | 1831 | ChemDiv7 | 3452 | Selleck-<br>3.33mM   | 3662 |
| ChemBridge3 | 1578 | ChemDiv6 | 1832 | ChemDiv7 | 3453 | Selleck-<br>3.33mM   | 3663 |
| ChemBridge3 | 1579 | ChemDiv6 | 1833 | ChemDiv7 | 3454 | Selleck-<br>3.33mM   | 3664 |
| ChemBridge3 | 1580 | ChemDiv6 | 1834 | ChemDiv7 | 3455 | Selleck-<br>1.11mM   | 3665 |
| ChemBridge3 | 1581 | ChemDiv6 | 1835 | ChemDiv7 | 3456 | Selleck-<br>1.11mM   | 3666 |

|             |      |          |      |          |      |                |      |
|-------------|------|----------|------|----------|------|----------------|------|
| ChemBridge3 | 1582 | ChemDiv6 | 1836 | ChemDiv7 | 3457 | Selleck-1.11mM | 3667 |
| ChemBridge3 | 1583 | ChemDiv6 | 1837 | ChemDiv7 | 3458 | Selleck-1.11mM | 3668 |
| ChemBridge3 | 1584 | ChemDiv6 | 1838 | ChemDiv7 | 3459 | Selleck-1.11mM | 3669 |
| ChemBridge3 | 1585 | ChemDiv6 | 1839 | ChemDiv7 | 3460 | Selleck-1.11mM | 3670 |
| ChemBridge3 | 1586 | ChemDiv6 | 1840 | ChemDiv7 | 3461 | Selleck-1.11mM | 3671 |
| ChemBridge3 | 1587 | ChemDiv6 | 1841 | ChemDiv7 | 3462 | LINCS4         | 3672 |
| ChemBridge3 | 1588 | ChemDiv6 | 1842 | ChemDiv7 | 3463 | LINCS4         | 3673 |
| ChemBridge3 | 1589 | ChemDiv6 | 1843 | ChemDiv7 | 3464 | LINCS4         | 3674 |
| ChemBridge3 | 1590 | ChemDiv6 | 1844 | ChemDiv7 | 3465 |                |      |
| ChemBridge3 | 1591 | ChemDiv6 | 1845 | ChemDiv7 | 3466 |                |      |

**Table S1. List of libraries used in NF- $\kappa$ B-induced Luminescence HTS Assay.** The 574 chemical libraries plate screened are listed, included known bioactive, academic collections and commercial libraries from various sources. All libraries were provided by the Institute of Chemistry and Cell Biology (ICCB)-Longwood, Harvard Medical School. Data related to high-throughput screening may be accessed per the ICCB-Longwood Screening Facility User Agreement.

**Table S2.**

| <b>Library</b> | <b>Plate</b> | <b>Library</b> | <b>Plate</b> |
|----------------|--------------|----------------|--------------|
| ChemBridge3    | 1581         | ChemDiv6       | 1833         |
| ChemBridge3    | 1582         | ChemDiv6       | 1836         |
| ChemBridge3    | 1583         | ChemDiv6       | 1864         |
| ChemBridge3    | 1585         | ChemDiv6       | 1865         |
| ChemBridge3    | 1588         | ChemDiv6       | 1896         |
| ChemBridge3    | 1593         | ChemDiv6       | 1897         |
| ChemBridge3    | 1594         | ChemDiv6       | 1901         |
| ChemBridge3    | 1596         | ChemDiv7       | 3432         |
| ChemDiv6       | 1825         | ChemDiv7       | 3437         |
| ChemDiv6       | 1831         | HME1           | 3576         |
| ChemDiv6       | 1832         |                |              |

**Table S2. List of libraries used in AlphaLISA HTS Assay.** The 21 down selected chemical libraries plate screened via counter TNF AlphaLISA assay are listed. All libraries were provided by the Institute of Chemistry and Cell Biology (ICCB)-Longwood, Harvard Medical School. Data related to high-throughput screening may be accessed per the ICCB-Longwood Screening Facility User Agreement.



Table S3.

| Compound ID          | TNF (Median) | TNF % (Median) | # replicates | Series                 | Mol. Wt. (Daltons) | SMILES                                                                        |
|----------------------|--------------|----------------|--------------|------------------------|--------------------|-------------------------------------------------------------------------------|
| 02-144-2             | 2.5245       | 104.32         | 5            | 6-Me Imidazopyrimidine | 376.84             | <chem>CC1=CN2C=C(N=C2N=C1)C1=CC=C(C)C(NC(=O)C2=CC=CC=C2C1)=C1</chem>          |
| 02-144-3 (PVP-037.1) | 5.397        | 99.81          | 5            | 6-Me Imidazopyrimidine | 410.40             | <chem>CC1=CN2C=C(N=C2N=C1)C1=CC=C(C)C(NC(=O)C2=CC=CC=C2C(F)(F)F)=C1</chem>    |
| 02-193               | 2.997        | 91.73          | 5            | Imidazopyrimidine      | 372.43             | <chem>CC1=CC=C(C=C1NC(=O)C(CO)C1=CC=CC=C1)C1=CN2C=CC=NC2=N1</chem>            |
| 37.16                | 3.5625       | 90.17          | 3            | Imidazopyrimidine      | 407.27             | <chem>O=C(C1=C(Br)C=CC=C1)NC2=C(C)C=CC(C3=CN4C=CC=NC4=N3)=C2</chem>           |
| 37.37                | 3.73         | 71.12          | 3            | Imidazopyrimidine      | 396.37             | <chem>O=C(C1=C(C(F)(F)F)C=CC=C1)NC2=C(C)C=CC(C3=CN4C=CC=NC4=N3)=C2</chem>     |
| Cpd 37               | 2.403        | 69.79          | 5            | Imidazopyrimidine      | 370.46             | <chem>O=C(C(C1=CC=CC=C1)CC)NC2=C(C)C=C(C(C3=CN4C=CC=NC4=N3)=C2</chem>         |
| 02-171               | 2.1615       | 65.93          | 5            | 6-F Imidazopyrimidine  | 428.39             | <chem>CC1=CC=C(C(=O)NC2=CC(=CC=C2C)C2=CN3C=C(F)C=NC3=N2)C(=C1)C(F)(F)F</chem> |
| 02-144-1             | 3.144        | 55.24          | 5            | 6-Me Imidazopyrimidine | 384.48             | <chem>CCC(C(=O)NC1=CC(=CC=C1C)C1=CN2C=C(C)C=NC2=N1)C1=CC=CC=C1</chem>         |
| 02-166               | 2.0745       | 53.91          | 5            | 6-F Imidazopyrimidine  | 432.35             | <chem>CC1=CC=C(C=C1NC(=O)C1=CC(F)=CC=C1C(F)(F)F)C1=CN2C=C(F)C=NC2=N1</chem>   |
| 02-167               | 1.101        | 51.62          | 5            | 6-F Imidazopyrimidine  | 432.35             | <chem>CC1=CC=C(C=C1NC(=O)C1=CC=C(F)C=C1C(F)(F)F)C1=CN2C=C(F)C=NC2=N1</chem>   |
| 02-118               | 1.8795       | 43.53          | 5            | 6-F Imidazopyrimidine  | 414.36             | <chem>CC1=CC=C(C=C1NC(=O)C1=CC=CC=C1C(</chem>                                 |

|          |        |       |   |                               |        |                                                                             |
|----------|--------|-------|---|-------------------------------|--------|-----------------------------------------------------------------------------|
|          |        |       |   |                               |        | <chem>F(F)F)C1=CN2C=C(F)C=NC2=N1</chem>                                     |
| 03-082   | 1.008  | 41.65 | 5 |                               |        |                                                                             |
| 02-174-1 | 0.924  | 35.71 | 5 | 6-Me<br>Imidazopyri<br>midine | 404.90 | <chem>CCC(C(=O)NC1=CC(=CC=C1C1)C1=CN2C=C(C)C=NC2=N1)C1=CC=CC=C1</chem>      |
| 02-187   | 1.191  | 31.32 | 5 | 6-F<br>Imidazopyri<br>midine  | 390.42 | <chem>COC1=CC=C(C)C(=C1)C(=O)NC1=CC(=CC=C1C)C1=CN2C=C(F)C=NC2=N1</chem>     |
| 37.33    | 0.288  | 22.94 | 4 | Imidazopyri<br>midine         | 362.82 | <chem>O=C(C1=C(C1)C=CC=C1)NC2=C(C)C=CC(C3=CN4C=CC=NC4=N3)=C2</chem>         |
| 37.17    | 0.865  | 20.64 | 3 | Imidazopyri<br>midine         | 342.40 | <chem>O=C(C1=C(C)C=CC=C1)NC2=C(C)C=CC(C3=CN4C=CC=NC4=N3)=C2</chem>          |
| 02-174-2 | 0.1455 | 13.99 | 5 | 6-Me<br>Imidazopyri<br>midine | 430.82 | <chem>CC1=CN2C=C(N=C2N=C1)C1=CC=C(C1)C(NC(=O)C2=CC=CC=C2C(F)(F)F)=C1</chem> |
| 03-003-1 | 0.219  | 9.05  | 5 | Thiazolopyr<br>idine          | 387.50 | <chem>CCC(C(=O)NC1=C(C)C=CC(=C1)C1=NC2=CC=CN=C2S1)C1=CC=CC=C1</chem>        |
| 02-116   | 0.594  | 8.48  | 5 | 6-F<br>Imidazopyri<br>midine  | 425.26 | <chem>CC1=CC=C(C=C1NC(=O)C1=CC=CC=C1Br)C1=CN2C=C(F)C=NC2=N1</chem>          |
| 03-081   | 0.3195 | 7.51  | 5 |                               |        |                                                                             |
| 02-162-2 | 0.309  | 6.34  | 5 | 6-Me<br>Imidazopyri<br>midine | 356.43 | <chem>CC1=CN2C=C(N=C2N=C1)C1=CC=C(C)C(NC(=O)C2=CC=CC=C2C)=C1</chem>         |
| 03-084-1 | 0.24   | 6.00  | 5 |                               |        |                                                                             |
| 02-125-3 | 0.234  | 5.47  | 5 | Imidazopyri<br>dine           | 341.41 | <chem>CC1=CC=C(C=C1NC(=O)CC1=CC=CC=C1)C1=CN2C=CC=CC2=N1</chem>              |
| 02-139-2 | 0.109  | 4.50  | 5 | Imidazopyri<br>dine           | 369.47 | <chem>CCC(C(=O)NC1=CC(=CC=C1C)C1=CN2C=CC=CC2=N1)C1=CC=CC=C1</chem>          |

|          |        |      |   |                                |        |                                                                         |
|----------|--------|------|---|--------------------------------|--------|-------------------------------------------------------------------------|
| 02-119   | 0.219  | 4.35 | 5 | 6-F<br>Imidazopyri<br>midine   | 388.45 | <chem>CCC(C(=O)NC1=CC(=CC=C1C)C1=CN2C=C(F)C=NC2=N1)C1=CC=CC=C1</chem>   |
| 03-003-3 | 0.075  | 3.97 | 5 | Imidazopyra<br>zine            | 370.46 | <chem>CCC(C(=O)NC1=CC(=CC=C1C)C1=CN2C=CN=CC2=N1)C1=CC=CC=C1</chem>      |
| 02-176   | 0.087  | 3.81 | 5 | 6-F<br>Imidazopyri<br>midine   | 390.42 | <chem>COC1=CC=C(C(=O)NC2=CC(=CC=C2C)C2=CN3C=C(F)C=NC3=N2)C(C)=C1</chem> |
| 02-139-1 | 0.051  | 3.62 | 5 | Imidazopyri<br>dine            | 395.39 | <chem>CC1=CC=C(C=C1NC(=O)C1=CC=CC=C1C(F)(F)F)C1=CN2C=CC=CC2=N1</chem>   |
| 03-078-4 | 0.0615 | 3.25 | 5 | Pyrazolopyr<br>imidine         | 370.46 | <chem>CCC(C(=O)NC1=CC(=CC=C1C)C1=NN2C=CC=NC2=C1)C1=CC=CC=C1</chem>      |
| 02-125-1 | 0.1915 | 3.13 | 5 | Imidazopyri<br>dine            | 361.83 | <chem>CC1=CC=C(C=C1NC(=O)C1=CC=CC=C1C1)C1=CN2C=CC=CC2=N1</chem>         |
| 02-117   | 0.138  | 3.06 | 5 | 6-F<br>Imidazopyri<br>midine   | 360.39 | <chem>CC1=CC=C(C=C1NC(=O)C1=CC=CC=C1C)C1=CN2C=C(F)C=NC2=N1</chem>       |
| 02-174-3 | 0.06   | 2.73 | 5 | Imidazothia<br>zole            | 401.41 | <chem>CC1=CC=C(C=C1NC(=O)C1=CC=CC=C1C(F)(F)F)C1=CN2C=CS2=N1</chem>      |
| 02-115   | 0.0625 | 2.42 | 5 | 6-F<br>Imidazopyri<br>midine   | 380.81 | <chem>CC1=CC=C(C=C1NC(=O)C1=CC=CC=C1C1)C1=CN2C=C(F)C=NC2=N1</chem>      |
| 02-125-2 | 0.1675 | 2.27 | 5 | Imidazopyri<br>dine            | 341.41 | <chem>CC1=CC=C(C=C1NC(=O)C1=CC=CC=C1C)C1=CN2C=CC=CC2=N1</chem>          |
| 02-177-3 | 0.0675 | 1.79 | 5 | Imidazothia<br>zole            | 375.49 | <chem>CCC(C(=O)NC1=CC(=CC=C1C)C1=CN2C=CSC2=N1)C1=CC=CC=C1</chem>        |
| 02-135   | 0.0705 | 1.60 | 5 | 6-MeO<br>Imidazopyri<br>midine | 426.40 | <chem>COC1=CN2C=C(N=C2N=C1)C1=CC=C(C)</chem>                            |

|          |        |      |   |                         |        |                                                                             |
|----------|--------|------|---|-------------------------|--------|-----------------------------------------------------------------------------|
|          |        |      |   |                         |        | <chem>C(NC(=O)C2=CC=CC=C2C(F)(F)F)=C1</chem>                                |
| 02-208   | 0.0495 | 1.56 | 5 | Imidazopyrazine         | 396.37 | <chem>CC1=CC=C(C=C1NC(=O)C1=CC=CC=C1C(F)(F)F)C1=CN2C=CN=CC2=N1</chem>       |
| 02-175   | 0.063  | 1.43 | 5 | 6-F Imidazopyrimidine   | 432.35 | <chem>CC1=CC=C(C=C1NC(=O)C1=C(F)C=CC=C1C(F)(F)F)C1=CN2C=C(F)C=NC2=N1</chem> |
| 03-086-2 | 0.0325 | 1.34 | 5 |                         |        |                                                                             |
| 02-137   | 0.04   | 1.27 | 5 | 6-MeO Imidazopyrimidine | 400.48 | <chem>CCC(C(=O)NC1=CC(=CC=C1C)C1=CN2C=C(OC)C=NC2=N1)C1=CC=CC=C1</chem>      |
| 03-003-2 | 0.034  | 1.02 | 5 | Oxazolopyridine         | 343.39 | <chem>CC1=CC=C(C=C1NC(=O)CC1=CC=CC=C1)C1=NC2=NC=CC=C2O1</chem>              |
| 02-162-4 | 0.008  | 0.77 | 5 | Imidazopyridazine       | 362.82 | <chem>CC1=CC=CC=C1C(=O)NC1=CC(=CC=C1C)C1=CN2N=CC=CC2=N1</chem>              |
| 02-154-2 | 0.008  | 0.77 | 5 | Imidazopyridazine       | 396.37 | <chem>CC1=CC=C(C=C1NC(=O)C1=CC=CC=C1C(F)(F)F)C1=CN2N=CC=CC2=N1</chem>       |
| 02-183   | 0.008  | 0.77 | 5 | Imidazopyrimidine       | 372.43 | <chem>COC1=CC=C(C)C(=C1)C(=O)NC1=CC(=CC=C1C)C1=CN2C=CC=NC2=N1</chem>        |
| 02-144-4 | 0.028  | 0.75 | 5 | Imidazopyridine         | 389.88 | <chem>CCC(C(=O)NC1=CC(=CC=C1C)C1=CN2C=CC=CC2=N1)C1=CC=CC=C1</chem>          |
| 02-144-7 | 0.0175 | 0.72 | 5 | Imidazopyridazine       | 390.87 | <chem>CCC(C(=O)NC1=CC(=CC=C1C)C1=CN2N=CC=CC2=N1)C1=CC=CC=C1</chem>          |
| 02-140-2 | 0.008  | 0.62 | 5 | Imidazopyridazine       | 342.40 | <chem>CC1=CC=C(C=C1NC(=O)CC1=CC=CC=C1)C1=CN2N=CC=CC2=N1</chem>              |
| 02-184-2 | 0.008  | 0.57 | 5 | Oxazolopyridine         | 371.44 | <chem>CCC(C(=O)NC1=CC(=CC=C1C)C1=NC2=NC=CC=C2O1)C1=CC=CC=C1</chem>          |

|          |       |      |   |                               |        |                                                                        |
|----------|-------|------|---|-------------------------------|--------|------------------------------------------------------------------------|
| 03-086-1 | 0.04  | 0.55 | 5 |                               |        |                                                                        |
|          |       |      |   | Imidazopyri<br>dine           | 361.83 | <chem>CC1=CC=CC=C1C(=O)NC1=CC(=CC=C1C1)C1=CN2C=CC=CC2=N1</chem>        |
| 02-144-6 | 0.016 | 0.52 | 5 |                               |        |                                                                        |
|          |       |      |   | 6-Me<br>Imidazopyri<br>midine | 356.43 | <chem>CC1=CN2C=C(N=C2N=C1)C1=CC=C(C)C(NC(=O)CC2=CC=CC=C2)=C1</chem>    |
| 02-162-1 | 0.008 | 0.42 | 5 |                               |        |                                                                        |
|          |       |      |   | Imidazopyri<br>dine           | 415.80 | <chem>FC(F)(F)C1=CC=CC=C1C(=O)NC1=CC(=CC=C1C1)C1=CN2C=CC=CC2=N1</chem> |
| 02-154-1 | 0.008 | 0.42 | 5 |                               |        |                                                                        |
|          |       |      |   | Thiazolopyr<br>idine          | 379.86 | <chem>CC1=CC=C(C=C1NC(=O)C1=C(Cl)C=CC=C1)C1=NC2=CC=CN=C2S1</chem>      |
| 03-078-1 | 0.008 | 0.42 | 5 |                               |        |                                                                        |
|          |       |      |   | Thiazolopyr<br>idine          | 359.45 | <chem>CC1=C(NC(=O)CC2=CC=CC=C2)C=C(C=C1)C1=NC2=CC=CN=C2S1</chem>       |
| 03-078-2 | 0.008 | 0.42 | 5 |                               |        |                                                                        |
|          |       |      |   | Thiazolopyr<br>idine          | 359.45 | <chem>CC1=CC=CC=C1C(=O)NC1=C(C)C=CC(=C1)C1=NC2=CC=CN=C2S1</chem>       |
| 03-078-3 | 0.008 | 0.42 | 5 |                               |        |                                                                        |
|          |       |      |   | Imidazopyri<br>midine         | 372.43 | <chem>COC1=CC=C(C(=O)NC2=CC(=CC=C2C)C2=CN3C=CC=NC3=N2)C(C)=C1</chem>   |
| 02-182   | 0.008 | 0.39 | 5 |                               |        |                                                                        |
|          |       |      |   | Oxazolopyri<br>dine           | 363.80 | <chem>CC1=CC=C(C=C1NC(=O)C1=CC=CC=C1C1)C1=NC2=NC=CC=C2O1</chem>        |
| 02-192-2 | 0.008 | 0.33 | 5 |                               |        |                                                                        |
|          |       |      |   | Imidazopyri<br>dazine         | 362.82 | <chem>CC1=CC=C(C=C1NC(=O)C1=CC=CC=C1C1)C1=CN2N=CC=CC2=N1</chem>        |
| 02-162-3 | 0.008 | 0.33 | 5 |                               |        |                                                                        |
|          |       |      |   | Imidazothia<br>zole           | 347.44 | <chem>CC1=CC=C(C=C1NC(=O)CC1=CC=CC=C1)C1=CN2C=CSC2=N1</chem>           |
| 02-177-1 | 0.008 | 0.33 | 5 |                               |        |                                                                        |
|          |       |      |   | Imidazothia<br>zole           | 347.44 | <chem>CC1=CC=C(C=C1NC(=O)C1=CC=CC=C1C)C1=CN2C=CSC2=N1</chem>           |
| 02-177-2 | 0.008 | 0.33 | 5 |                               |        |                                                                        |
|          |       |      |   | Oxazolopyri<br>dine           | 343.39 | <chem>CC1=CC=C(C=C1NC(=O)C1=C(C)C=CC=C1)C1=NC2=NC=CC=C2O1</chem>       |
| 02-192-1 | 0.008 | 0.33 | 5 |                               |        |                                                                        |

|          |       |      |   |                                |        |                                                                              |
|----------|-------|------|---|--------------------------------|--------|------------------------------------------------------------------------------|
| 02-184-1 | 0.008 | 0.33 | 5 | Oxazolopyri<br>dine            | 397.36 | <chem>CC1=CC=C(C=C1NC(=O)C1=CC=CC=C1C(F)(F)F)C1=NC2=NC=CC=C2O1</chem>        |
| 02-177-4 | 0.008 | 0.33 | 5 | Imidazothia<br>zole            | 367.85 | <chem>CC1=CC=C(C=C1NC(=O)C1=CC=CC=C1C1)C1=CN2C=CSC2=N1</chem>                |
| 02-140-1 | 0.008 | 0.20 | 5 | Imidazopyri<br>dazine          | 370.46 | <chem>CCC(C(=O)NC1=CC(=CC=C1C)C1=CN2N=CC=CC2=N1)C1=CC=CC=C1</chem>           |
| 02-144-5 | 0.008 | 0.20 | 5 | Imidazopyri<br>dine            | 361.83 | <chem>C1C1=CC=C(C=C1NC(=O)CC1=CC=CC=C1)C1=CN2C=CC=CC2=N1</chem>              |
| 02-103   | 0.008 | 0.18 | 5 | Imidazopyri<br>midine          | 342.40 | <chem>CC1=CC=C(C=C1NC(=O)CC1=CC=CC=C1)C1=CN2C=CC=NC2=N1</chem>               |
| 02-169   | 0.008 | 0.18 | 5 | 6-F<br>Imidazopyri<br>midine   | 448.81 | <chem>CC1=CC=C(C=C1NC(=O)C1=CC=C(C1)C=C1C(F)(F)F)C1=CN2C=C(F)C=NC2=N1</chem> |
| 02-132   | 0.008 | 0.18 | 5 | 6-MeO<br>Imidazopyri<br>midine | 437.30 | <chem>COC1=CN2C=C(N=C2N=C1)C1=CC=C(C)C(NC(=O)C2=CC=CC=C2Br)=C1</chem>        |
| 02-131   | 0.008 | 0.18 | 5 | 6-MeO<br>Imidazopyri<br>midine | 392.84 | <chem>COC1=CN2C=C(N=C2N=C1)C1=CC=C(C)C(NC(=O)C2=CC=CC=C2C1)=C1</chem>        |
| 02-134   | 0.008 | 0.18 | 5 | 6-MeO<br>Imidazopyri<br>midine | 372.43 | <chem>COC1=CN2C=C(N=C2N=C1)C1=CC=C(C)C(NC(=O)C2=CC=CC=C2C)=C1</chem>         |
| 02-140-3 | 0.008 | 0.18 | 5 | Imidazopyri<br>dazine          | 342.40 | <chem>CC1=CC=C(C=C1NC(=O)C1=CC=CC=C1C)C1=CN2N=CC=CC2=N1</chem>               |
| 02-154-3 | 0.008 | 0.18 | 5 | Imidazopyri<br>dine            | 382.24 | <chem>C1C1=CC=C(C=C1NC(=O)C1=CC=CC=C1Cl)C1=CN2C=CC=CC2=N1</chem>             |
| 02-194   | 0.008 | 0.18 | 5 | 6-F<br>Imidazopyri<br>midine   | 390.42 | <chem>CC1=CC=C(C=C1NC(=O)C(CO)C1=CC=CC=C1)C1=CN2C=C(F)C=NC2=N1</chem>        |

**Table S3. *In vitro* efficacy of PVP-037 analogs as benchmarked to R848.** TNF production measured by ELISA after stimulation of adult peripheral blood mononuclear cells for PVP-037 analogs or R848 at 33  $\mu$ M for ~18 hours. Analogs are ranked top to bottom by median percentage TNF production (TNF %) as compared to R848. Compounds inducing TNF > 15% of R848 are indicated in green. N = 3 - 5.

**Data S1. (multiple sheets):** Data generated in this study; each datasheet labeled with the figure number.
